# Supplementary material for: Ferric Uptake Regulator Provides a New Strategy for Acidophile Adaptation to Acidic Ecosystems
Source: PubMed Central journal article supplement (PMC7237784; doi:10.1128/aem.00268-20), 2020-05-19
Supplement: AEM.00268-20-s0001.pdf [file AEM.00268-20-s0001.pdf]

## Supplemental Materials

### Ferric uptake regulator provides a new strategy for acidophile adaptation to acidic ecosystems

Xian-ke Chen, Xiao-yan Li, Yi-fan Ha, Jian-qiang Lin, Xiang-mei Liu, Xin Pang, Jian-qun Lin<sup>\*</sup>, and Lin-xu Chen<sup>\*</sup>

State Key Laboratory of Microbial Technology, Shandong University, No. 72 Binhai Road, Qingdao 266237, P.R. China.

#### \* Correspondence:

Lin-Xu Chen, Jian-Qun Lin

linxuchen@sdu.edu.cn, jianqunlin@sdu.edu.cn

### Supplemental Materials and Methods

#### Plasmid construction, protein expression and purification

The *fur* gene was PCR-amplified from *A. caldus* MTH-04 chromosome and inserted into the *Nde* I and *Xho* I sites of pET22b and the resulting plasmid was transformed into *E. coli* DH5 $\alpha$  cells. To study AcFur protein properties, three AcFur mutants (Site I (SI) H31A/H88A, Site II (SII) E106A/H123A, SiteI and SiteII (SI&SII) H31A/H88A/E106A/H123A) were generated by site-directed mutagenesis. All plasmids were confirmed by DNA sequencing (GENEWIZ, Tianjin, China).

*E. coli* BL21 Star harboring the *fur* and *fur* mutants plasmids were grown in LB medium of 0.01% FeCl<sub>2</sub> containing 100  $\mu$ g/mL Amp until the OD<sub>600</sub> = 0.8 and were induced by adding isopropyl  $\beta$ -D-1-thiogalactopyranoside (IPTG) (0.2 mM, final concentration) and incubating overnight at 18 °C. The cells were harvested by centrifugation at 8000 $\times$ g for 15 min at 4 °C and lysed by ultrasonication in lysis buffer (25 mM Tris-HCl pH 8.0, 200 mM NaCl, 0.2 mM phenyl methane sulfonyl fluoride). After centrifugation at 17 000 $\times$ g for 1 h at 4 °C, the supernatant was loaded to a Ni-NTA column (GE Healthcare), followed by a

24 washing buffer (25 mM Tris-HCl pH 8.0, 200 mM NaCl, 20 mM imidazole). The His-tagged AcFur and  
25 AcFur mutants were eluted with elution buffer (25 mM Tris-HCl pH 8.0, 100 mM NaCl, and 250 mM  
26 imidazole). Purified AcFur and AcFur mutants were analyzed by a 15% sodium dodecyl sulfate-  
27 polyacrylamide gel electrophoresis (SDS-PAGE) followed by coomassie brilliant blue R-250 staining.

## 28 **Bioinformatics analysis of conservation of Fur proteins in the bacteria of AMD ecosystems**

29 The evolutionary conservation structure and sequences of Fur were assessed using the ConSurf  
30 server(1). The ConSurf web servers calculated the evolutionary conservation of amino acid positions in the  
31 AcFur using an empirical Bayesian paradigm. The conservation scores were grouped into a nine grades scale  
32 and projected onto the structure and on the MSA for visualization.

## 33 **Supplemental Figures**

34 **Fig. S1 Construction procedure of  $\Delta fur$  and complementation strains.** (A) Schematic representation of  
35 markerless gene knockout procedure. (B&C) Confirmation of  $\Delta fur$  by PCR. Positions of verification primers  
36 used for PCR to confirm *fur* deletion. Lanes 1, 3, and 5, PCR amplifications from *A. caldus* MTH-04 wild  
37 type chromosome with primers F1/R1, F2/R2 and F3/R3, respectively. Lanes 2, 4, and 6, PCR  
38 amplifications from the *A. caldus* MTH-04  $\Delta fur$  chromosome with primers F1/R1, F2/R2 and F3/R3,  
39 respectively. (D&E) Confirmation of complementation strains by PCR. Positions of verification primers  
40 used for PCR to confirm complementation mutagenesis. Lanes 1, 2, 3, 4, 5, and 6, PCR amplifications with  
41  $\Delta fur$  (*fur*),  $\Delta fur$  (S I),  $\Delta fur$  (S II),  $\Delta fur$  (S I & II),  $\Delta fur$ , and WT chromosome, respectively. UHA and DHA  
42 represent upstream and downstream homologous arms, respectively.

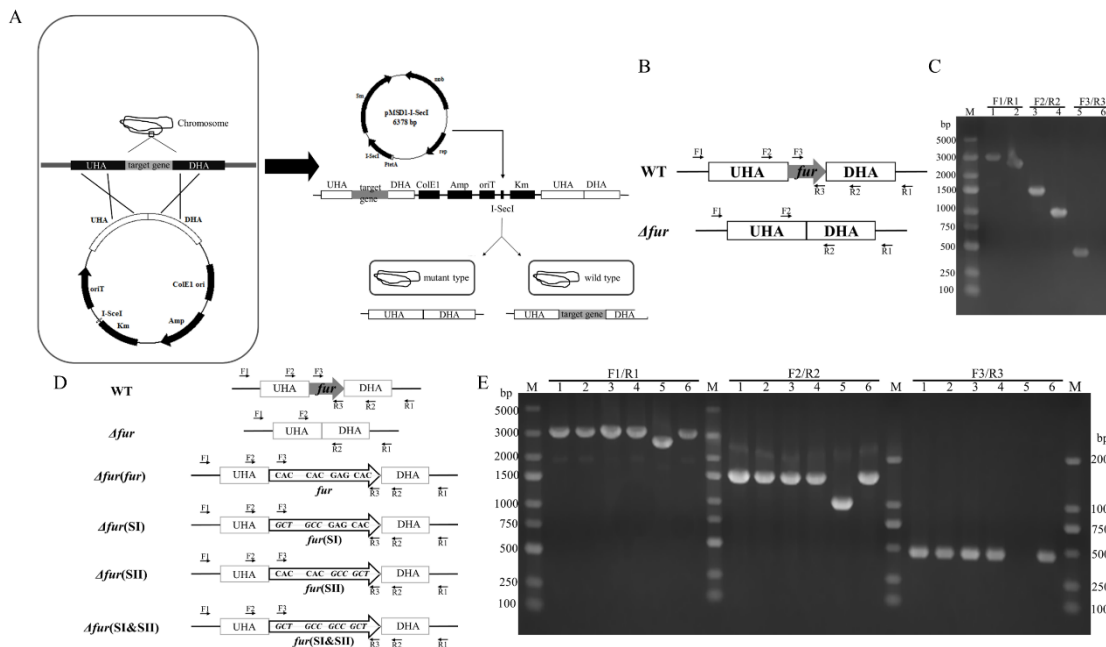

**Fig. S2 Structure and sites conservation analysis of AcFur proteins and its homologs based on**

*Acidithiobacillus*. (A&B) The nine-color conservation grades are projected onto the structure and sequence of AcFur protein. The variable positions (grade 1) colored turquoise, the intermediately conserved positions (grade 5) colored white, the most conserved positions (grade 9) colored maroon.

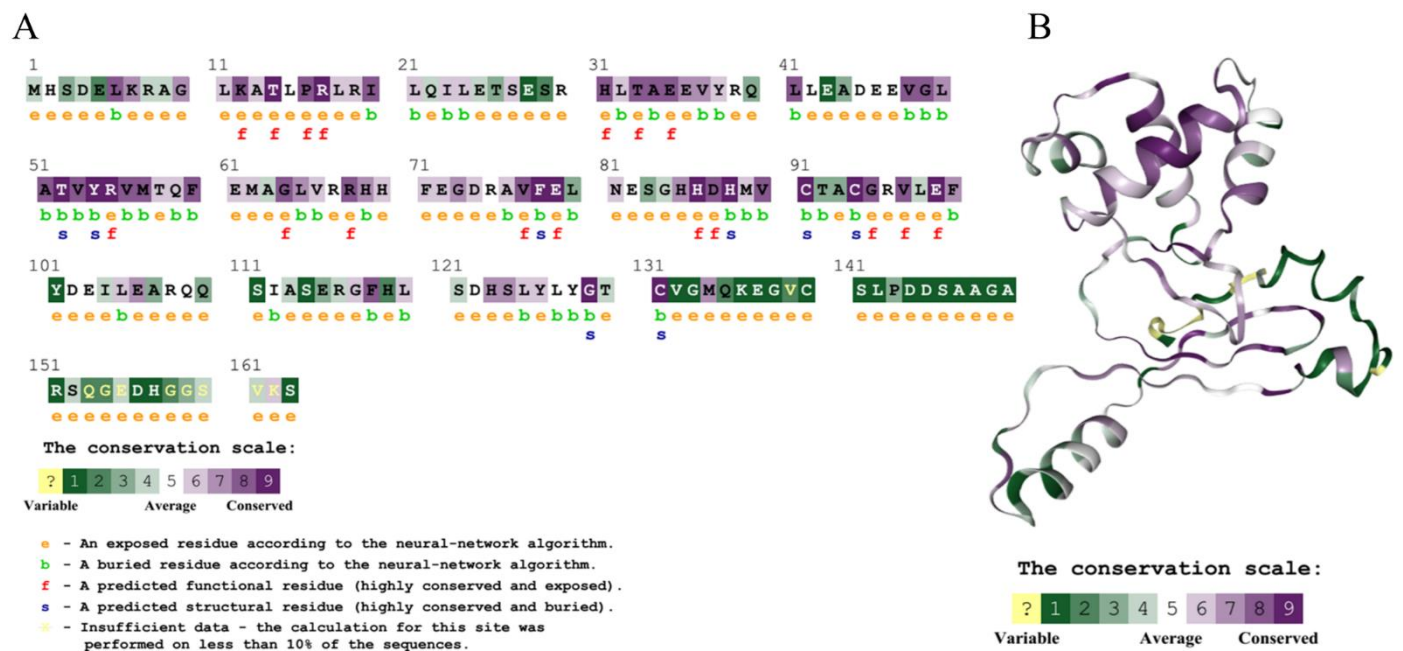

**Fig. S3 Soluble test of Recombinant protein pET22b-dC.** Recombinant protein pET22b-dC was pointed by red arrows. Lane M: M5 Prestained Protein Ladder Maker; lanes ce-s corresponding to the total proteins and supernatant of pET-22b; lanes ce-e corresponding to the crude extraction (ce), supernatant (s), flow (f),

52 washing (w), elution (e) of pET-22b-dC.

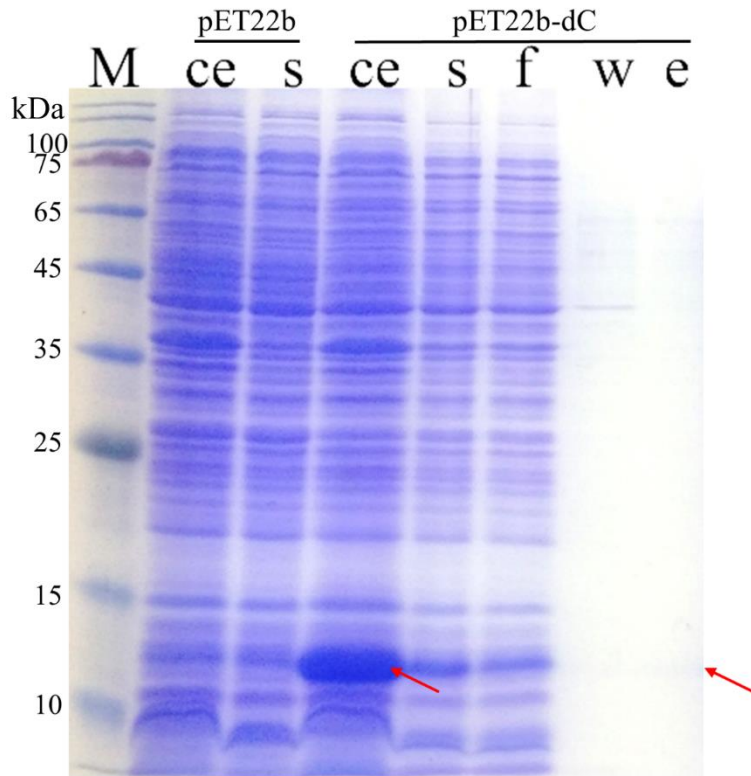

53

54 **Supplemental Table**

55 **Table S1 Occurrence of fur and DtxR genes in published genomic information of AMD bacteria.**

| Phylum                                      | Bacteria                                  | Assembly level                      | Fur             | DtxR           |    |
|---------------------------------------------|-------------------------------------------|-------------------------------------|-----------------|----------------|----|
| <i>α</i> Proteobacteria                     | <i>Acidiphilium cryptum</i> JF-5          | complete genome                     | NO              | NO             |    |
|                                             | <i>Acidiphilium multivorum</i> AIU301     | complete genome                     | NO              | NO             |    |
|                                             | <i>Acidiphilium angustum</i> ATCC 35903   | Scaffold                            | NO              | NO             |    |
|                                             | <i>Acidiphilium rubrum</i> ATCC 35905     | Scaffold                            | NO              | NO             |    |
|                                             | <i>Acidocella aminolytica</i> 101         | Scaffold                            | WP_048880410.1  | NO             |    |
|                                             | <i>Acidocella facilis</i> ATCC 35904      | Contig                              | WP_026439175.1  | NO             |    |
|                                             | <i>Acidomonas methanolica</i> NBRC 104435 | Scaffold                            | WP_081797598.1  | NO             |    |
|                                             | <i>β</i> Proteobacteria                   | <i>Ferroplasma myxofaciens</i> P3G  | Contig          | WP_031595537.1 | NO |
|                                             |                                           | <i>Thiomonas intermedia</i> K12     | complete genome | WP_013121860.1 | NO |
|                                             |                                           | <i>Thiomonas arsenitoxydans</i> 3As | Chromosome      | WP_013104191.1 | NO |
| <i>Thiomonas delicata</i> DSM 16361         |                                           | Scaffold                            | WP_094159584.1  | NO             |    |
| <i>Thiomonas bhubaneswarensis</i> DSM 18181 |                                           | Scaffold                            | WP_055449419.1  | NO             |    |

|                                      |                                           |                 |                |                |
|--------------------------------------|-------------------------------------------|-----------------|----------------|----------------|
| <i>γProteobacteria</i>               | <i>Acidiferrobacter thiooxydans</i>       |                 |                |                |
|                                      | ZJ                                        | Contig          | WP_083996317.1 | NO             |
|                                      | <i>Acidiferrobacter sp. SPIII_3</i>       | complete genome | WP_110138519.1 | NO             |
|                                      | <i>Acidihalobacter ferrooxidans</i>       |                 |                |                |
|                                      | V8                                        | Chromosome      | WP_076835706.1 | NO             |
|                                      | <i>Acidihalobacter prosperus</i>          |                 |                |                |
| <i>Acidithiobacilla</i>              | F5                                        | complete genome | WP_070077907.1 | NO             |
|                                      | <i>Metallibacterium scheffleri</i>        |                 |                |                |
|                                      | DKE6                                      | Contig          | WP_081127454.1 | NO             |
|                                      | <i>Acidithiobacillus thiooxidans</i>      |                 |                |                |
|                                      | ATCC 19377                                | Scaffold        | WP_010641352.1 | NO             |
|                                      | <i>Acidithiobacillus ferrooxidans</i>     |                 |                |                |
|                                      | ATCC 23270                                | complete genome | WP_012536062.1 | NO             |
|                                      | <i>Acidithiobacillus caldus</i>           | complete genome | WP_004869019.1 | NO             |
|                                      | <i>Acidithiobacillus ferrivorans</i>      |                 |                |                |
|                                      | SS3                                       | complete genome | WP_014030069.1 | NO             |
|                                      | <i>Acidithiobacillus ferridurans</i>      |                 |                |                |
|                                      | JCM 18981                                 | complete genome | WP_113526343.1 | NO             |
| <i>Acidithiobacillus albertensis</i> |                                           |                 |                |                |
| DSM 14366                            | Scaffold                                  | WP_010641352.1  | NO             |                |
| <i>δproteobacteria</i>               | <i>Desulfomonile tiedjei</i>              |                 |                |                |
|                                      | DSM 6799                                  | complete genome | WP_014810043.1 | WP_014809611.1 |
| <i>Acidobacteria</i>                 | <i>Acidobacterium ailaoui</i>             |                 |                |                |
|                                      | PMMR2                                     | Contig          | WP_026442842.1 | WP_049961364.1 |
|                                      | <i>Acidobacterium capsulatum</i>          |                 |                |                |
|                                      | ATCC 51196                                | complete genome | WP_015898090.1 | ACO33208.1     |
|                                      | <i>Granulicella mallensis</i>             |                 |                |                |
|                                      | MP5ACTX8                                  | complete genome | WP_014263331.1 | AEU38646.1     |
|                                      | <i>Granulicella pectinivorans</i>         |                 |                |                |
|                                      | DSM 21001                                 | Contig          | WP_089840414.1 | WP_089837736.1 |
|                                      | <i>Granulicella rosea</i>                 |                 |                |                |
|                                      | DSM 18704                                 | Contig          | WP_089407384.1 | WP_142988166.1 |
|                                      | <i>Granulicella tundricola</i>            |                 |                |                |
|                                      | MP5ACTX9                                  | complete genome | WP_013572743.1 | ADW70438.1     |
| <i>Terriglobus saanensis</i>         |                                           |                 |                |                |
| SP1PR4                               | complete genome                           | ADV82922.1      | ADV82279.1     |                |
| <i>Terriglobus roseus</i>            |                                           |                 |                |                |
| DSM 18391                            | complete genome                           | NO              | AFL86563.1     |                |
| <i>Nitrospirae</i>                   | <i>Leptospirillum rubarum</i>             | Scaffold        | WP_014959897.1 | NO             |
|                                      | <i>Leptospirillum ferriphilum</i>         |                 |                |                |
|                                      | ML-04/YSK                                 | complete genome | WP_014959897.1 | NO             |
|                                      | <i>Leptospirillum ferrooxidans</i>        |                 |                |                |
|                                      | C2-3                                      | complete genome | WP_014448348.1 | NO             |
|                                      | <i>Leptospirillum sp. Group II 'CF-1'</i> | complete genome | AKS24796.1     | NO             |
|                                      | <i>Leptospirillum sp. Group II 'C75'</i>  | Scaffold        | EIJ75953.1     | NO             |

|                       |                                                     |                 |                |                |
|-----------------------|-----------------------------------------------------|-----------------|----------------|----------------|
|                       | <i>Leptospirillum ferro Diazotrophum</i>            | /               | EES52611.1     | NO             |
|                       | <i>Leptospirillum sp. Group IV 'UBA BS'</i>         | Scaffold        | NO             | NO             |
| <i>Actinobacteria</i> | <i>Acidimicrobium ferrooxidans</i> DSM 10331        | complete genome | ACU53263.1     | NO             |
|                       | <i>Acidithrix ferrooxidans</i> Py-F3                | Contig          | WP_052604974.1 | NO             |
|                       | <i>Candidatus Koribacter versatilis</i> Ellin345    | complete genome | ABF42368.1     | NO             |
|                       | <i>Candidatus Solibacter usitatus</i> Ellin6076     | complete genome | ABJ82847.1     | ABJ83168.1     |
|                       | <i>Ferrimicrobium acidiphilum</i> DSM 19497         | Scaffold        | KJE75465.1     | NO             |
|                       | <i>Ferrithrix thermotolerans</i> DSM 19514          | Scaffold        | SHE49700.1     | NO             |
| <i>Firmicutes</i>     | <i>Sulfobacillus benefaciens</i>                    | Scaffold        | PSR32246.1     | NO             |
|                       | <i>Sulfobacillus acidophilus</i> DSM 10332          | complete genome | AEJ38577.1     | NO             |
|                       | <i>Sulfobacillus thermosulfidooxidans</i> DSM 9293  | Scaffold        | WP_051351132.1 | NO             |
|                       | <i>Sulfobacillus sp.</i> Hq2                        | Scaffold        | WP_103375064.1 | NO             |
|                       | <i>Sulfobacillus thermotolerans</i> Kr              | /               | AUW95357.1     | NO             |
|                       | <i>Alicyclobacillus acidiphilus</i> NBRC 100859     | Contig          | WP_067621411.1 | WP_067621532.1 |
|                       | <i>Alicyclobacillus acidocaldarius</i> DSM 446      | complete genome | ACV59616.1     | WP_012811361.1 |
|                       | <i>Alicyclobacillus acidoterrestris</i> ATCC 49025  | Contig          | EPZ52565.1     | EPZ52800.1     |
|                       | <i>Alicyclobacillus macrosporangiidus</i> DSM 17980 | Scaffold        | WP_074951538.1 | WP_074955662.1 |
|                       | <i>Alicyclobacillus mali</i> NBRC 102425            | Contig          | WP_067846234.1 | WP_067845958.1 |
|                       | <i>Alicyclobacillus herbarius</i> DSM 13609         | Scaffold        | WP_026961358.1 | WP_026960854.1 |
|                       | <i>Alicyclobacillus contaminans</i> DSM 17975       | Scaffold        | WP_026975363.1 | WP_035485231.1 |
|                       | <i>Alicyclobacillus hesperidum</i>                  | Scaffold        | NO             | WP_006446406.1 |
|                       | <i>Alicyclobacillus montanus</i> USBA-GBX-503       | Scaffold        | WP_072873733.1 | WP_072872655.1 |
|                       | <i>Alicyclobacillus ferrooxydans</i> TC-34          | Contig          | WP_054968265.1 | WP_054970710.1 |
|                       | <i>Alicyclobacillus shizuokensis</i> NBRC 103103    | Contig          | WP_067927130.1 | WP_067923196.1 |

|                      |                                                            |                 |                |                |
|----------------------|------------------------------------------------------------|-----------------|----------------|----------------|
|                      | <i>Alicyclobacillus sendaiensis</i><br>NBRC 100866         | Contig          | WP_062305267.1 | WP_062307455.1 |
|                      | <i>Alicyclobacillus</i><br><i>kakegawensis</i> NBRC 103104 | Contig          | WP_067932739.1 | WP_067930834.1 |
|                      | <i>Alicyclobacillus</i><br><i>tengchongensis</i>           | Contig          | NO             | WP_006446406.1 |
|                      | <i>Alicyclobacillus sacchari</i><br>DSM 17974              | Scaffold        | WP_134158132.1 | WP_134158038.1 |
|                      | <i>Alicyclobacillus pomorum</i><br>DSM 14955               | Scaffold        | WP_026964647.1 | NO             |
|                      | <i>Alicyclobacillus vulcanalis</i><br>DSM 16176            | Scaffold        | WP_143232488.1 | WP_076348602.1 |
|                      | <i>Desulfosporosinus</i><br><i>acidiphilus</i> SJ4         | complete genome | AFM41980.1     | NO             |
|                      | <i>Desulfosporosinus youngiae</i><br>DSM 17734             | Chromosome      | EHQ90093.1     | NO             |
|                      | <i>Desulfosporosinus orientis</i><br>DSM 765               | complete genome | AET68842.1     | NO             |
|                      | <i>Desulfosporosinus lacus</i><br>DSM 15449                | Scaffold        | SHH87716.1     | SHI82465.1     |
|                      | <i>Desulfosporosinus hippei</i><br>DSM 8344                | Scaffold        | SDG84826.1     | NO             |
|                      | <i>Desulfosporosinus meridiei</i><br>DSM 13257             | complete genome | AFQ44521.1     | NO             |
|                      | <i>Desulfosporosinus</i><br><i>fructosivorans</i> 63.6F    | Scaffold        | WP_135548847.1 | WP_135550222.1 |
| <i>Aquificae</i>     | <i>Hydrogenobaculum</i> sp.                                | complete genome | WP_012513885.1 | NO             |
| <i>Euryarchaeota</i> | <i>Thermoplasma acidophilum</i><br>DSM 1728                | complete genome | NO             | DtxR 406J_A    |
|                      | <i>Thermoplasma volcanium</i><br>GSS1                      | complete genome | BAB59437.1     | BAB60108.1     |
|                      | <i>Thermoplasma</i> sp. Kam2015                            | Contig          | WP_110642587.1 | WP_110641559.1 |
|                      | <i>Cuniculiplasma divulgatum</i><br>PM4                    | complete genome | WP_021789929.1 | NO             |
|                      | <i>Picrophilus oshimae</i> DSM<br>9789                     | Contig          | NO             | SMD31358.1     |
|                      | <i>Picrophilus torridus</i> DSM<br>9790                    | complete genome | NO             | AAT43733.1     |
|                      | <i>Acidiplasma aeolicum</i>                                | Contig          | NO             | WP_048101435.1 |
|                      | <i>Acidiplasma cupricumulans</i>                           | Contig          | NO             | WP_048101435.1 |
|                      | <i>Acidiplasma</i> sp. MBA-1                               | Contig          | NO             | WP_048101435.1 |
|                      | <i>Ferroplasma acidarmanus</i><br>fer1                     | complete genome | NO             | AGO60290.1     |
|                      | <i>Ferroplasma acidiphilum</i>                             | complete genome | NO             | WP_081142639.1 |
|                      | <i>Ferroplasma thermophilum</i>                            | /               | NO             | NO             |
|                      | <i>Ferroplasma</i><br><i>cyprexacervatum</i>               | Contig          | NO             | WP_048101435.1 |

|                      |                                           |                 |    |                |
|----------------------|-------------------------------------------|-----------------|----|----------------|
| <i>Crenarchaeota</i> | <i>Ferroplasma cupricumulans</i>          | Contig          | NO | WP_048101435.1 |
|                      | <i>Acidianus hospitalis</i> W1            | complete genome | NO | AEE93435.1     |
|                      | <i>Acidianus sulfidivorans</i> JP7        | complete genome | NO | AWR97065.1     |
|                      | <i>Acidianus brierleyi</i> DSM 1651       | complete genome | NO | WP_110270607.1 |
|                      | <i>Acidianus manzaensis</i> YN-25         | complete genome | NO | ARM75708.1     |
|                      | <i>Candidatus Acidianus copahuensis</i>   | Contig          | NO | WP_048100246.1 |
|                      | <i>Acidilobus saccharovorans</i> 345-15   | complete genome | NO | NO             |
|                      | <i>Acidilobus</i> sp. 7A                  | complete genome | NO | NO             |
|                      | <i>Metallosphaera sedula</i>              | complete genome | NO | WP_012021943.1 |
|                      | <i>Metallosphaera hakonensis</i> JCM 8857 | complete genome | NO | AWR99707.1     |
|                      | <i>Metallosphaera yellowstonensis</i>     | complete genome | NO | WP_048088038.1 |
|                      | <i>Metallosphaera cuprina</i> Ar-4        | Scaffold        | NO | AEB94380.1     |
|                      | <i>Metallosphaera prunae</i>              | complete genome | NO | QCO30441.1     |
|                      | <i>Sulfolobus islandicus</i>              | Complete        | NO | WP_012711465.1 |
|                      | <i>Sulfolobus acidocaldarius</i>          | Complete        | NO | WP_011277038.1 |
|                      | <i>Sulfolobus metallicus</i>              | Contig          | NO | WP_054838202.1 |
|                      | <i>Sulfurisphaera tokodaii</i>            | complete genome | NO | WP_010980111.1 |
|                      | <i>Saccharolobus solfataricus</i> P2      | complete genome | NO | AAK40972.1     |

## 56 **References**

- 57 1. Ashkenazy H, Erez E, Martz E, Pupko T, Ben-Tal N. 2010. ConSurf 2010: calculating evolutionary conservation in sequence and  
58 structure of proteins and nucleic acids. *Nucleic Acids Res* 38:W529-33.
